# Supplementary material for: Chemical profiling and effects of extracts from Laminaria japonica and Ulva prolifera on rooting and seedling development of common bean
Source: Research Square preprint supplement (doi:10.21203/rs.3.rs-4277123/v1), 2024-04-27
Supplement: Supplementary file 1 [file d499fabdef76bbd87a1025c9.docx]

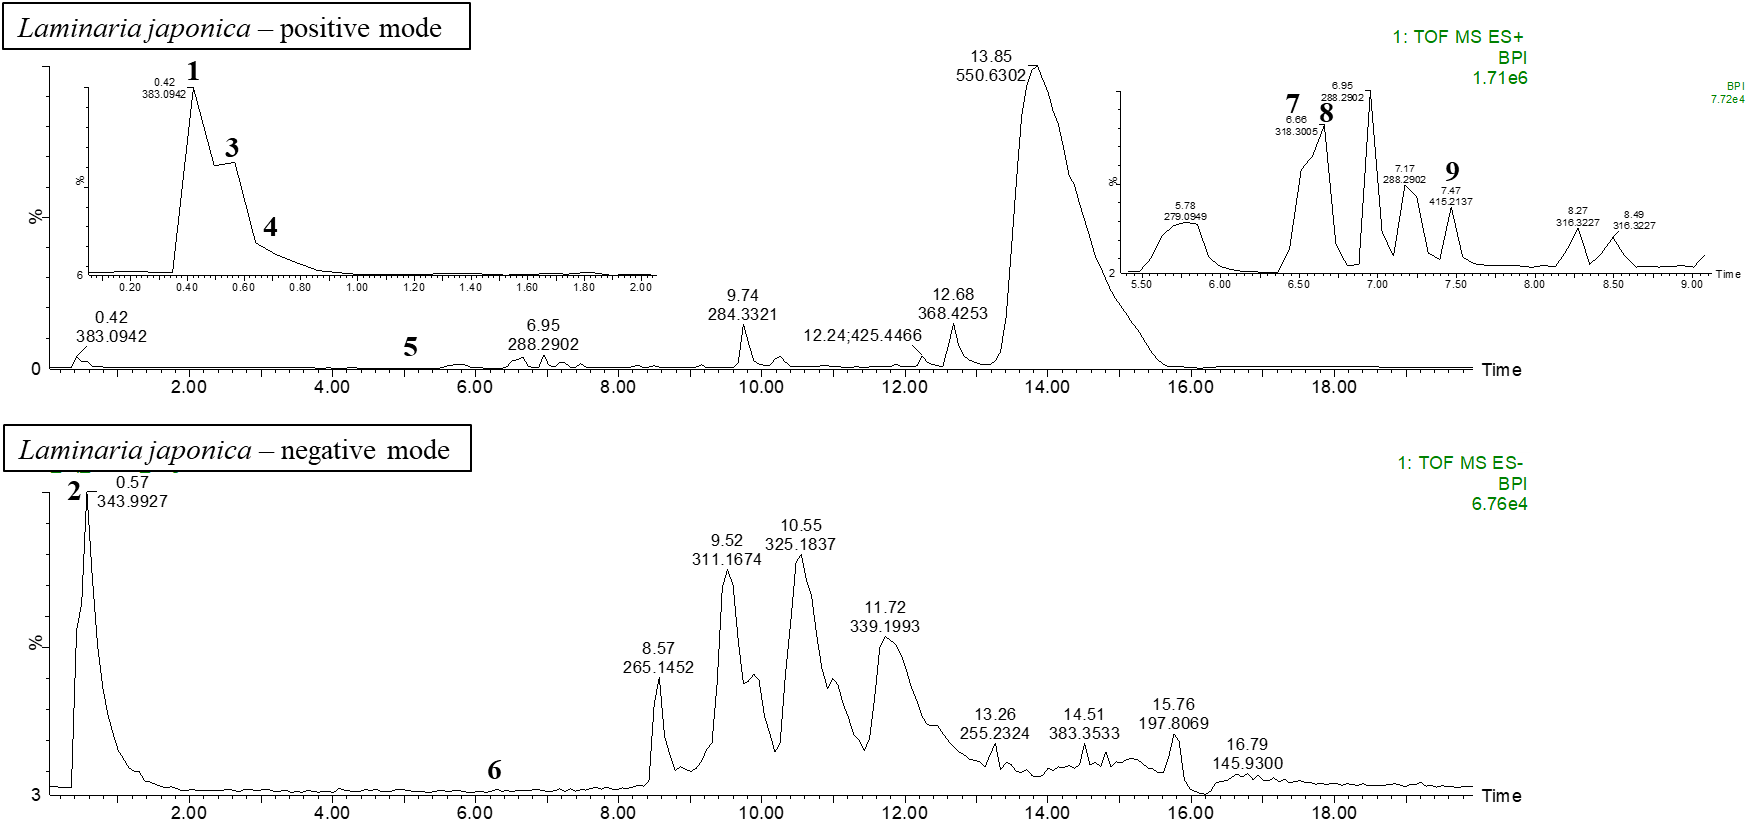


**Fig S1.** Chromatography of *Laminaria japonica* liquid extracts (LLE) with positive and negative mode.


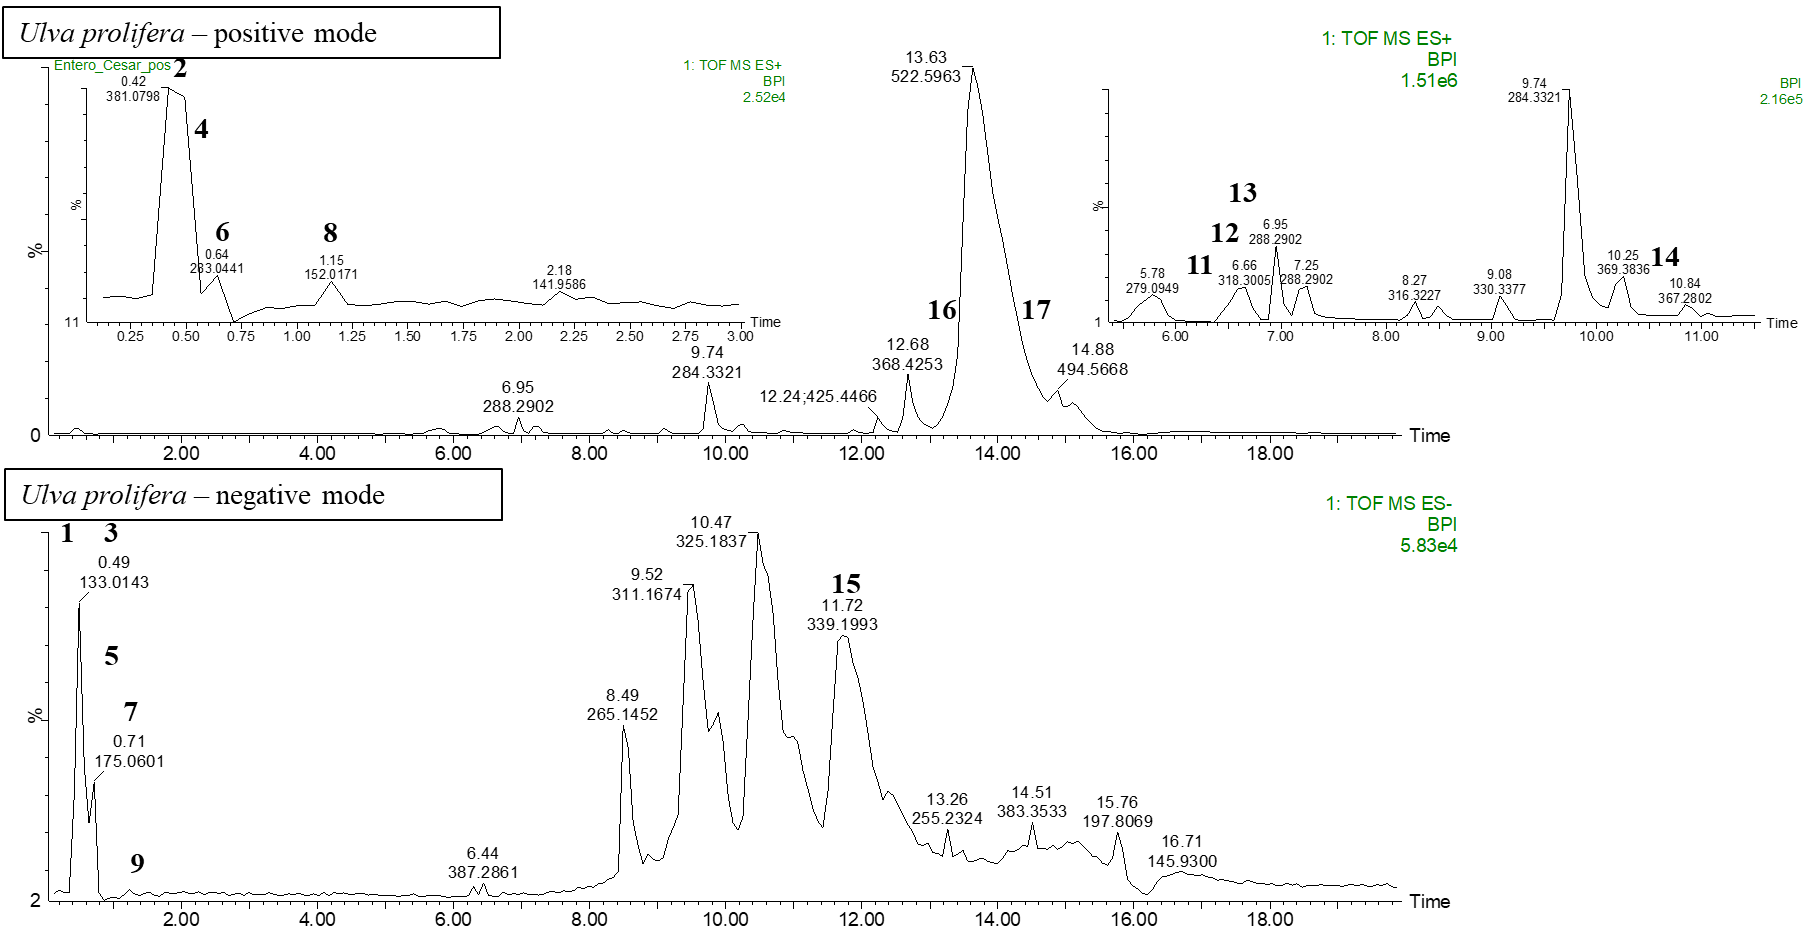


**Fig S2.** Chromatography of *Ulva prolifera* liquid extract (ULE) with positive and negative mode.


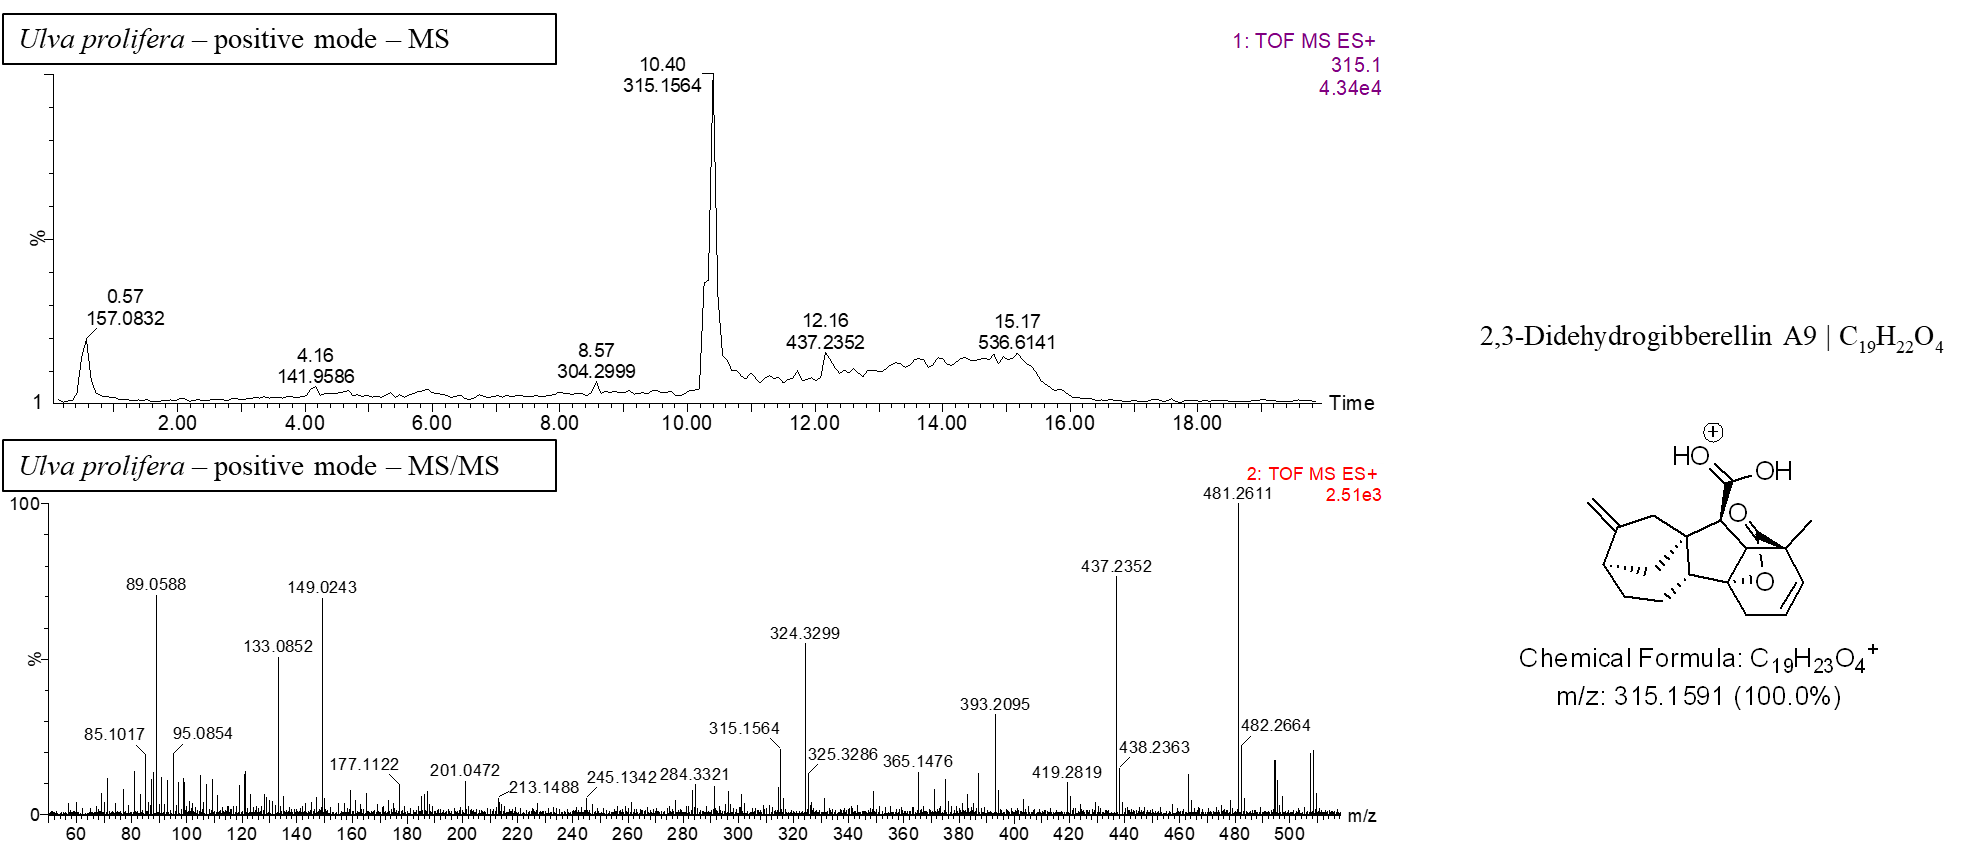


**Fig. S3.** Chromatography of *Ulva prolifera* liquid extract (ULE) indicating position and structural formula of 2,3 didehydro-Gibberellin A9.
